# Supplementary material for: Epidemiology and Genetic Characteristics of Carbapenem-Resistant Escherichia coli in Chinese Intensive Care Unit Analyzed by Whole-Genome Sequencing: a Prospective Observational Study
Source: PubMed Central journal article supplement (PMC10100791; doi:10.1128/spectrum.04010-22), 2023-02-21
Supplement: spectrum.04010-22-s0001.pdf [file spectrum.04010-22-s0001.pdf]

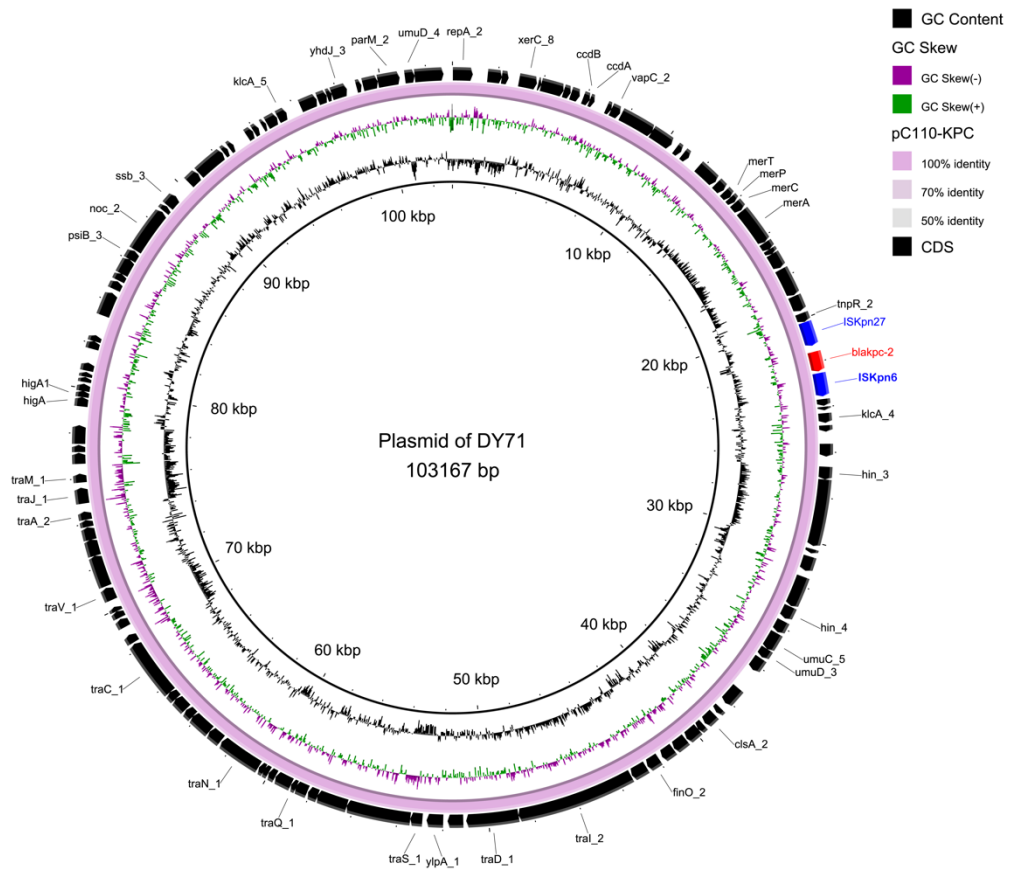

Figure S1: Comparison of *bla*<sub>KPC-2</sub>-carrying plasmid of DY71 with plasmid pC110-KPC (accession number: CP047692.1).

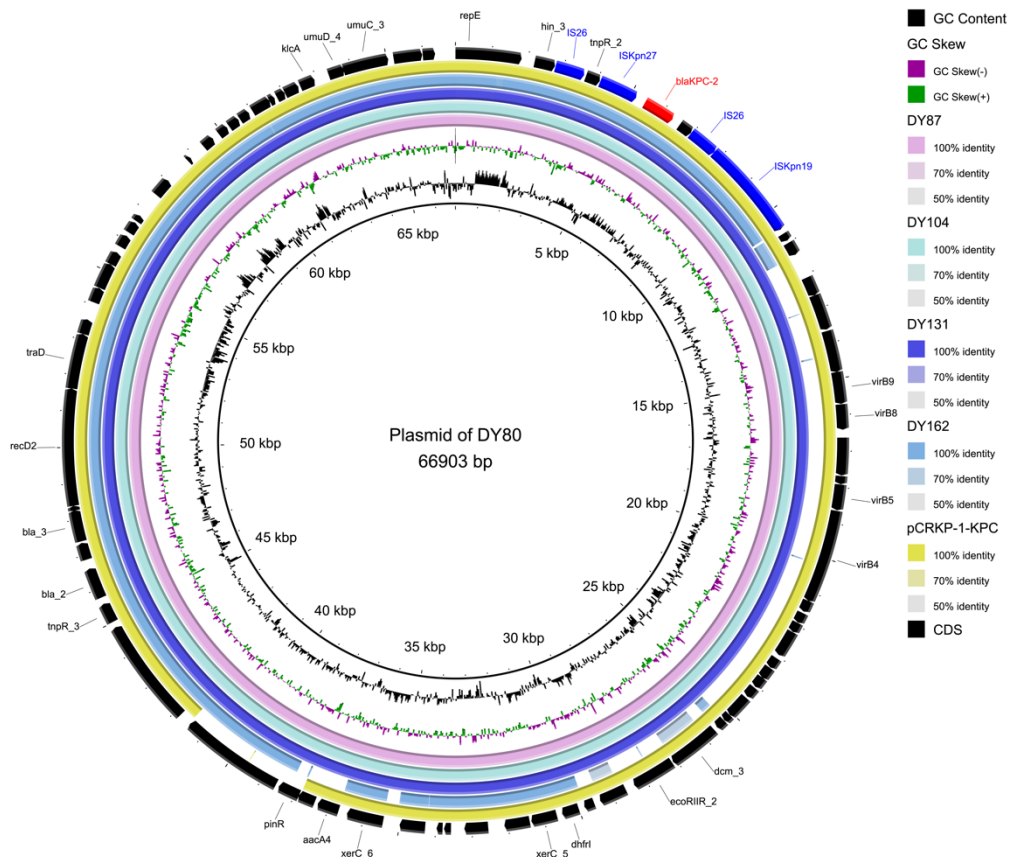

Figure S2: Comparison of *bla*<sub>KPC-2</sub>-carrying plasmid of DY80, DY87, DY104, DY131 and DY162 with plasmid pCRKP-1-KPC (accession number: KX928750.1).

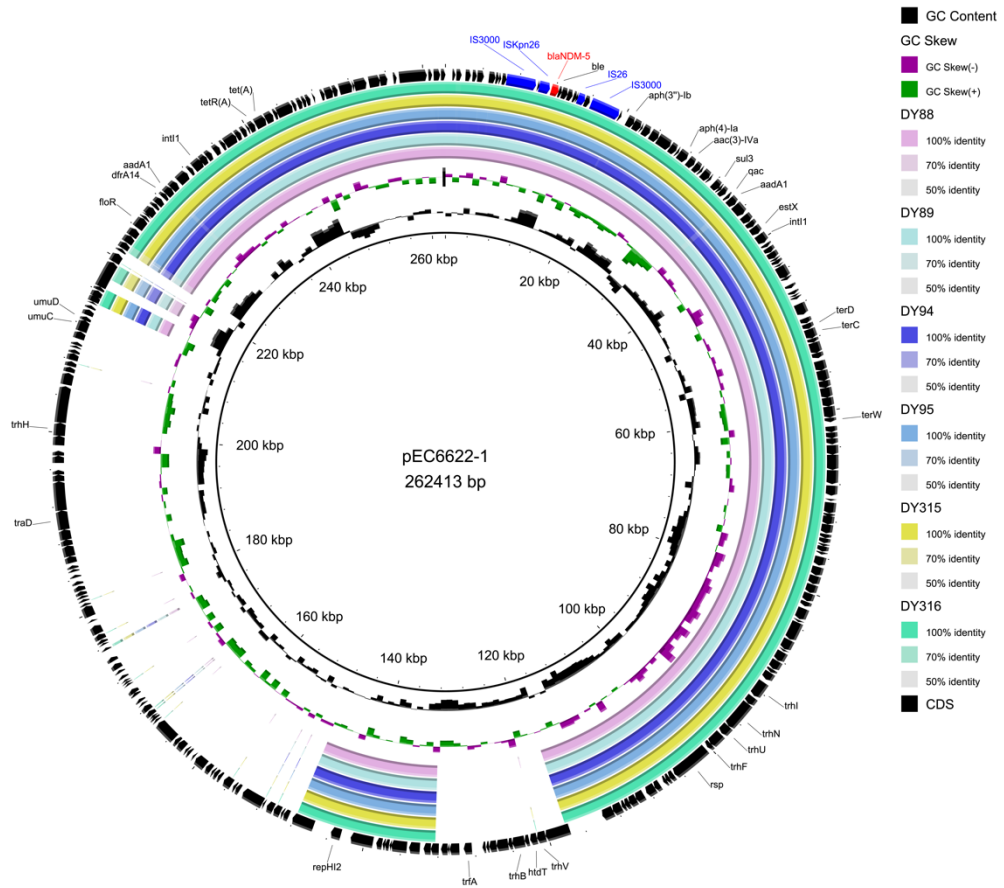

Figure S3: Comparison of *bla*<sub>NDM-5</sub>-carrying plasmid of DY88, DY89, DY94, DY95, DY315 and DY316 with plasmid pEC6622-1 (accession number: CP096588).

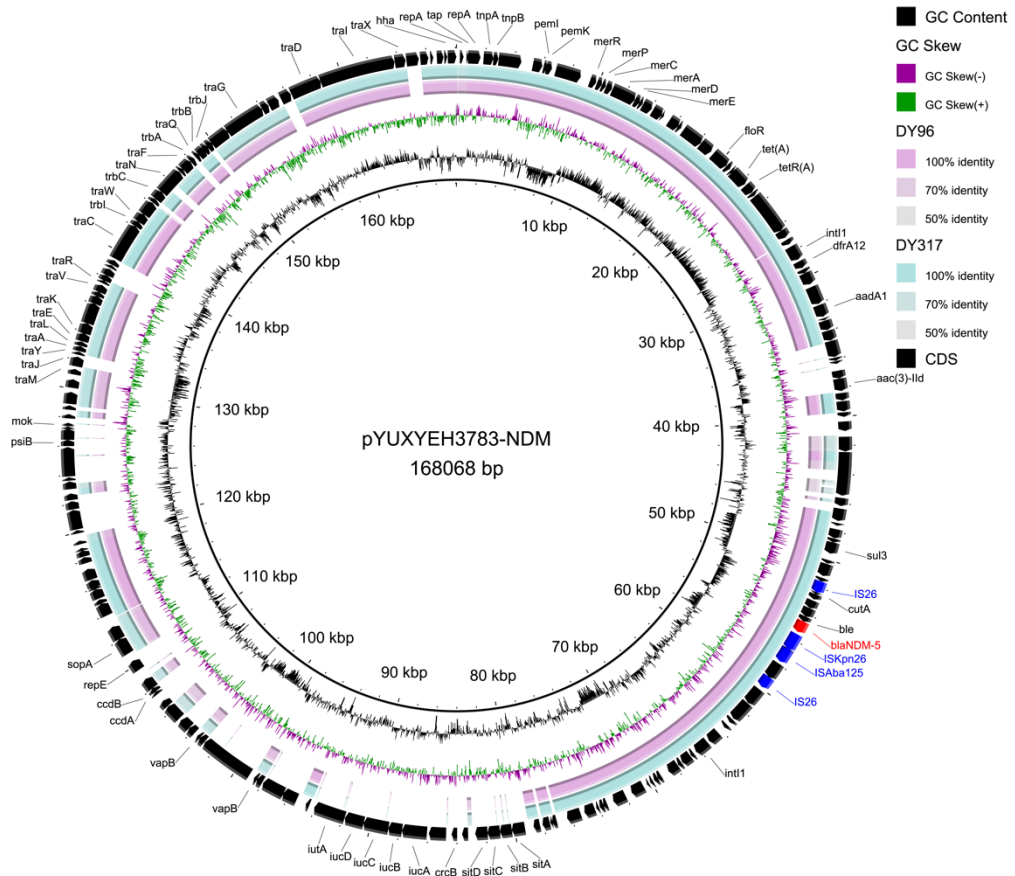

Figure S4: Comparison of *bla*<sub>NDM-5</sub>-carrying plasmid of DY96 and DY317 with plasmid pYUXYEH3783-NDM (accession number: CP110998).
